# Supplementary material for: Microbial methane production from calcium carbonate at moderately alkaline pH
Source: Research Square preprint supplement (doi:10.21203/rs.3.rs-4790757/v1), 2024-08-16
Supplement: Supplementary file 1 [file cc2325afe9a789e59ecd2f49.xlsx]

## Sheet: README
Supplementary Data 1. Metabolic potential for enrichment metagenome assembled genomes.
Sheet name	Description
pathways	metabolisms defined by stepwise completeness of a single pathway
present-absent	metabolisms defined by the presence of certain genes or the presence of one of several possible pathways
Element	Metabolism	Source	Tool(s)	Sheet	Line #
carbon	Calvin-Benson cycle	KEGG	DRAM, anvi'o	pathways	5
carbon	Arnon-Buchanan cycle	KEGG	DRAM, anvi'o	pathways	59
carbon	3-hydroxypropionate bi-cycle	KEGG	DRAM, anvi'o	pathways	140
carbon	Hydroxypropionate-hydroxybutylate cycle	KEGG	DRAM, anvi'o	pathways	191
carbon	Dicarboxylate-hydroxybutyrate cycle	KEGG	DRAM, anvi'o	pathways	236
carbon	Wood-Ljungdahl pathway	KEGG, BioCyc	DRAM, anvi'o	pathways	286
carbon	Reductive glycine pathway	BioCyc	Pathway Tools	pathways	395
carbon	Hydrogenotrophic methanogenesis	KEGG	DRAM, anvi'o	pathways	446
carbon	Methylotrophic methanogenesis (methylamines)	KEGG	DRAM, anvi'o	pathways	494
carbon	Methylotrophic methanogenesis (methanol)	KEGG	DRAM, anvi'o	pathways	526
carbon	Acetoclastic methanogenesis	KEGG	DRAM, anvi'o	pathways	544
carbon	Methane oxidation	KEGG	DRAM, anvi'o	pathways	619
carbon	Acetate oxidation	KEGG	DRAM, anvi'o	present-absent	6
carbon	Bicarbonate conversion	KEGG	manual	present-absent	12
carbon	Fermentation	BioCyc	Pathway Tools	present-absent	63
carbon	Stickland fermentation	BioCyc	Pathway Tools	present-absent	121
carbon	Syntrophic lactate fermentation	BioCyc	manual	present-absent	367
carbon	Anaplerotic bicarbonate assimilation	KEGG	manual	present-absent	420
nitrogen	Dissimilatory nitrate reduction	KEGG	DRAM, anvi'o	pathways	646
nitrogen	Assimilatory nitrate reduction	KEGG	DRAM, anvi'o	pathways	670
nitrogen	Denitrification	KEGG	DRAM, anvi'o	pathways	697
nitrogen	Nitrogen fixation	KEGG	DRAM, anvi'o	pathways	723
nitrogen	Nitrification	KEGG	DRAM, anvi'o	pathways	744
nitrogen	Anammox (from ammonia)	KEGG	DRAM, anvi'o	pathways	763
nitrogen	Anammox (from nitrite)	KEGG	DRAM, anvi'o	pathways	779
sulfur	Assimilatory sulfate reduction	KEGG	DRAM, anvi'o	pathways	799
sulfur	Dessimilatory sulfate reduction	KEGG	DRAM, anvi'o	pathways	829
sulfur	Thiosulfate disproportionation	BioCyc	Pathway Tools	pathways	852
sulfur	Thiosulfate oxidation (to tetrathionate)	BioCyc	Pathway Tools	pathways	871
sulfur	Thiosulfate oxidation (to sulfate)	KEGG	DRAM, anvi'o	pathways	884
sulfur	Sulfide oxidation	BioCyc	Pathway Tools	pathways	905
sulfur	Sulfite oxidation	BioCyc	Pathway Tools	pathways	941
sulfur	Sulfur reduction	BioCyc	Pathway Tools	pathways	1003
sulfur	Tetrathionate oxidation	BioCyc	Pathway Tools	pathways	1042
sulfur	Tetrathionate reduction	BioCyc	Pathway Tools	pathways	1055
sulfur	Desulfonation	KEGG	manual	present-absent	19
hydrogen	Hydrogen oxidation	METABOLIC	METABOLIC	present-absent	37
hydrogen	Hydrogen production	BioCyc	Pathway Tools	present-absent	57
oxygen	Oxygen metabolism	TIGRfam, Pfam	METABOLIC	present-absent	400
calcium	Ca2+-transporting P-type ATPase	KEGG	manual	present-absent	416

## Sheet: key genes
Pathway	Key enzyme(s)	EC	Key gene(s)	KO
					g__Arachnia;s__Arachnia lapidicapta	g__UBA2212;s__	g__Acetoanaerobium;s__Acetoanaerobium noterae	g__Nitratidesulfovibrio;s__	g__Methanobacterium_D;s__	g__Pseudomonas_A;s__Pseudomonas_A stutzeri
Reductive pentose phosphate cycle (Calvin-Benson)	phosphoribulokinase	2.7.1.19	PRK, prkB	K00855	1	0	0	0	0	0
	ribulose-bisphosphate carboxylase	4.1.1.39	rbcL, cbbL	K01601	0	0	0	0	0	0
			rbcS, cbbS	K01602	0	0	0	0	0	0
	All required genes for key enzyme(s)?				N	N	N	N	N	N
Reductive citrate cycle (Arnon-Buchanan)	ATP-citrate lyase	2.3.3.8	aclA	K15230	0	0	0	0	0	0
			aclB	K15231	0	0	0	0	0	0
	or
	citryl-CoA synthetase; citryl-CoA lyase	6.2.1.18	ccsA	K15232	0	0	0	0	0	0
			ccsB	K15233	0	0	0	0	0	0
		4.1.3.34	ccl	K15234	0	0	0	0	0	0
	All required genes for key enzyme(s)?				N	N	N	N	N	N
Reductive acetyl-CoA pathway (Wood-Ljungdahl)	Carbon monoxide dehydrogenase/acetyl-CoA synthase (CODH/ACS)	1.2.7.4	cdhA, ascA	K00192; K00198	0	0	1	1	1	0
		2.3.1.169	cdhC, acsB	K00193; K14138	0	0	1	0	1	0
		2.1.1.245	cdhD, acsD	K00194	0	0	1	0	1	0
			cdhE, acsC	K00197	0	0	1	0	1	0
		2.1.1.258	acsE	K15023	0	0	1	0	0	0
	All required genes for key enzyme(s)?				N	N	Y	N	N	N
Reductive glycine pathway	glycine reductase	1.21.4.2	grdA	K10670	0	0	1	0	0	0
			grdE	K10671	0	0	1	0	0	0
			grdB	K10672	0	0	1	0	0	0
			grdD	K21576	0	0	1	0	0	0
			grdC	K21577	0	0	1	0	0	0
	All required genes for key enzyme(s)?				N	N	Y	N	N	N
Methanogenesis	methyl-CoM reductase	2.8.4.1	mcrA	K00399	0	0	0	0	1	0
			mcrB	K00401	0	0	0	0	1	0
			mcrG	K00402	0	0	0	0	1	0
	All required genes for key enzyme(s)?				N	N	N	N	Y	N
Nitrogen fixation	nitrogenase	1.18.6.1	nifD	K02586	0	0	0	1	1	1
			nifK	K02591	0	0	0	1	1	1
			nifH	K02588	0	0	0	1	1	1
	All required genes for key enzyme(s)?				N	N	N	Y	Y	Y
Denitrification	nitrite reductase	1.7.2.1	nirK	K00368	1	0	0	0	0	0
			or
			nirS	K15864	0	0	0	0	0	1
	All required genes for key enzyme(s)?				Y	N	N	N	N	Y
Dissimilatory nitrate reduction
Assimilatory nitrate reduction

## Sheet: pathways
				g__Tessaracoccus;s__Tessaracoccus lapidicaptus	g__UBA2212;s__	g__Acetoanaerobium;s__Acetoanaerobium noterae	g__Nitratidesulfovibrio;s__	g__Methanobacterium;s__	g__Pseudomonas;s__Pseudomonas stutzeri
				1 = present, 0 = absent
Reductive pentose phosphate cycle (Calvin-Benson) [M00165]
D-ribulose 5-phosphate
	prk	K00855		1	0	0	0	0	0
D-ribulose 1,5-bisphosphate + carbon dioxide
	rbcL	K01601		1	0	0	0	0	0
	optional
	rbcS	K01602		0	0	0	0	0	0
3-phospho-D-glycerate
	pgk	K00927		1	1	1	1	1	1
3-phospho-D-glyceroyl phosphate
	GAPA	K05298		0	0	0	0	0	0
	or
	gap2	K00150		0	0	0	0	1	0
	or
	GAPDH	K00134		1	1	1	1	0	1
D-glyceraldehyde 3-phosphate
	ALDO	K01623		1	0	0	0	0	0
	or
	fba	K01624		1	1	1	1	0	1
D-fructose 1,6-bisphosphate
	fbp	K03841		1	0	0	1	0	1
	or
	glpX	K02446		0	0	1	1	0	0
	or
	glpX-SEBP	K11532		0	0	0	0	0	0
	or
	fbp-SEBP	K01086		0	0	0	0	0	0
D-fructose 6-phosphate
	tkt	K00615		1	1	1	1	0	1
D-erythrose 4-phosphate
	ALDO	K01623		1	0	0	0	0	0
	or
	fba	K01624		1	1	1	1	0	1
Sedoheptulose 1,7-bisphosphate
	E3.1.3.37	K01100		0	0	0	0	0	0
	or
	glpX-SEBP	K11532		0	0	0	0	0	0
	or
	fbp-SEBP	K01086		0	0	0	0	0	0
Sedoheptulose 7-phosphate
	tkt	K00615		1	1	1	1	0	1
D-ribose 5-phosphate
	rpiA	K01807		0	0	0	0	1	1
	or
	rpiB	K01808		1	1	1	1	0	0
D-ribulose 5-phosphate
Steps (unrepeated)				9
Steps complete				8	5	6	6	3	6
Completeness (%)				88.8889	55.5556	66.6667	66.6667	33.3333	66.6667
Reductive citrate cycle (Arnon-Buchanan) [M00173]
Acetyl-CoA
	porA	K00169		0	0	1	0	1	0
	porB	K00170		0	0	1	0	1	0
	porD	K00171		0	0	1	0	1	0
	porC	K00172		0	0	1	0	1	0
	or
	por	K03737		1	1	1	1	0	0
Pyruvate
	pps	K01007		0	0	0	1	1	1
	or
	ppdK	K01006		1	1	1	0	0	0
	and
	ppc	K01595		1	1	0	0	0	1
	or
	pycA	K01959		0	0	0	0	1	1
	pycB	K01960		0	0	0	0	1	1
	or
	PC	K01958		1	0	1	1	0	0
Oxaloacetate
	mdh	K00024		1	0	0	0	1	0
(S)-malate
	fum	K01676		1	0	0	0	0	1
	or
	FH	K01679		1	0	0	1	0	1
	or
	fumA	K01677		0	1	1	1	1	0
	fumB	K01678		0	1	1	1	1	0
Fumarate
	sdhA	K00239		1	0	0	0	0	1
	sdhB	K00240		1	0	0	1	1	1
	optional
	sdhC	K00241		1	0	0	0	0	1
	optional
	sdhD	K00242		0	0	0	0	0	1
	or
	frdA	K00244		0	1	0	0	0	0
	frdB	K00245		0	0	0	1	0	0
	optional
	frdC	K00246		0	0	0	1	0	0
	optional
	frdD	K00247		0	0	0	0	0	0
	or
	frdA	K18556		0	0	0	0	0	0
	frdB	K18557		0	0	0	0	0	0
	frdC	K18558		0	0	0	0	0	0
	frdD	K18559		0	0	0	0	0	0
	frdE	K18560		0	0	0	0	0	0
Succinate
	sucD	K01902		1	0	0	1	1	1
	sucC	K01903		1	0	0	0	1	1
Succinyl-CoA
	korA	K00174		1	1	1	1	1	0
	korB	K00175		1	1	1	1	1	0
	optional
	korC	K00177		0	1	1	1	1	0
	optional
	korD	K00176		0	1	1	1	1	0
2-oxoglutarate
	IDH1	K00031		1	0	1	1	0	1
Isocitrate
	acnA	K01681		1	0	0	0	0	1
	or
	acnB	K01682		0	0	0	0	0	1
cis-Aconitate
	aclA	K15230		0	0	0	0	0	0
	aclB	K15231		0	0	0	0	0	0
	or
	ccsA	K15232		0	0	0	0	0	0
	ccsB	K15233		0	0	0	0	0	0
	and
	ccl	K15234		0	0	0	0	0	1
Citrate
Steps (unrepeated)				10
Steps complete				9	4	5	5	6	7
Completeness (%)				90	40	50	50	60	70
3-hydroxypropionate bi-cycle [M00376]
Acetyl-CoA
	accB	K02160		0	1	1	0	0	1
	accC	K01961		0	1	1	0	1	1
	accD	K01962		0	1	1	1	0	1
	accA	K01963		0	1	1	0	0	1
Malonyl-CoA
	mcr	K14468		0	0	0	0	0	0
3-hydroxypropionate
	K11468	K14469		0	0	0	0	0	0
Propionyl-CoA
	K15052	K15052		0	0	0	0	0	0
(S)-methylmalonyl-CoA
	MCEE	K05606		1	0	1	0	0	0
(R)-methylmalonyl-CoA
	MUT	K01847		1	0	0	0	0	0
	or
	mcmA1	K01848		0	0	1	0	0	0
	mcmA2	K01849		1	0	1	0	0	0
Succinyl-CoA (+ (S)-malate)
	smtA1	K14471		0	0	0	0	0	0
	smtB	K14472		0	0	0	0	0	0
Succinate (+ (S)-malyl-CoA)
	sdhA	K00239		1	0	0	0	0	1
	sdhB	K00240		1	0	0	1	1	1
	sdhC	K00241		1	0	0	0	0	1
Fumarate
	FH	K01679		1	0	0	1	0	1
(S)-malate + (S)-malyl-CoA
	mcl	K08691		0	0	0	0	0	0
Acetyl-CoA, glyoxylate
Propionyl-CoA, glyoyoxylate
	mcl	K08691		0	0	0	0	0	0
(2R,3S)-2-methylmalyl-CoA
	mch	K14449		0	0	0	0	0	0
2-methylfumaryl-CoA
	mct	K14470		0	0	0	0	0	0
3-methylfumaryl-CoA
	meh	K09709		0	0	0	0	0	1
(S)-citramalyl-CoA
	mcl	K08691		0	0	0	0	0	0
Acetyl-CoA, pyruvate
Steps (unrepeated)				13
Steps complete				4	1	3	1	0	3
Completeness (%)				30.7692	7.6923	23.0769	7.6923	0	30.7692
Hydroxypropionate-hydroxybutylate cycle [M00375]
Acetyl-CoA
	K01964	K01964		0	0	0	0	0	0
	K15037	K15037		0	0	0	0	0	0
	K15036	K15036		0	0	0	0	0	0
Malonyl-CoA
	K15017	K15017		0	0	0	0	0	0
Malonate semialdehyde
	K15039	K15039		0	0	0	0	0	0
3-hydroxypropionate
	K15018	K15018		0	0	0	0	0	0
3-hydroxypropionyl-CoA
	K15019	K15019		0	0	0	0	0	0
Acryloyl-CoA
	K15020	K15020		0	0	0	0	0	0
Propionyl-CoA
	MCEE	K05606		1	0	1	0	0	0
Methylmalonyl-CoA
	mcmA	K01848		0	0	1	0	0	0
	mcmB	K01849		1	0	1	0	0	0
Succinyl-CoA
	K15038	K15038		0	0	0	0	0	0
	or
	K15017	K15017		0	0	0	0	0	0
Succinate semialdehyde
	K14465	K14465		1	0	0	0	0	0
4-hydroxybutanoic acid
	K14466	K14466		0	0	0	0	0	0
	or
	K18861	K18861		0	0	0	0	0	0
4-hydroxybutyryl-CoA
	abfD	K14534		0	0	0	0	0	0
Crotonoyl-CoA
	K15016	K15016		0	0	0	0	0	0
(S)-hydroxybutanoyl-CoA
	ACAT	K00626		1	1	1	0	1	1
Acetoacetyl-CoA
Steps (unrepeated)				14
Steps complete				3	1	3	0	1	1
Completeness (%)				21.4286	7.14285	21.4286	0	7.14285	7.14285
Dicarboxylate-hydroxybutyrate cycle [M00374]
Acetyl-CoA
	porA	K00169		0	0	1	0	1	0
	porB	K00170		0	0	1	0	1	0
	porD	K00171		0	0	1	0	1	0
	porC	K00172		0	0	1	0	1	0
Pyruvate
	pps	K01007		0	0	0	1	1	1
Phosphoenolpyruvate
	ppc	K01595		1	1	0	0	0	1
Oxaloacetate
	mdh	K00024		1	0	0	0	1	0
(S)-malate
	fumA	K01677		0	1	1	1	1	0
	fumB	K01678		0	1	1	1	1	0
Fumarate
	sdhA	K00239		1	0	0	0	0	1
	sdhB	K00240		1	0	0	1	1	1
	optional
	sdhC	K00241		1	0	0	0	0	1
	optional
	sdhD	K18860		0	0	0	0	0	1
Succinate
	sucD	K01902		1	0	0	1	1	1
	sucC	K01903		1	0	0	0	1	1
Succinyl-CoA
	K15038	K15038		0	0	0	0	0	0
	or
	K15017	K15017		0	0	0	0	0	0
Succinate semialdehyde
	K14465	K14465		1	0	0	0	0	0
4-hydroxybutanoic acid
	4hbl	K14467		0	0	0	0	0	0
	or
	K18861	K18861		0	0	0	0	0	0
4-hydroxybutyryl-CoA
	abfD	K14534		0	0	0	0	0	0
Crotonoyl-CoA
	K15016	K15016		0	0	0	0	0	0
(S)-3-hydroxybutanoyl-CoA
	ACAT	K00626		1	1	1	0	1	1
Acetoacetyl-CoA
				6	3	3	2	6	5
Steps (unrepeated)				13
Steps complete				6	3	3	2	6	5
Completeness (%)				46.1538	23.0769	23.0769	15.3846	46.1538	38.4615
Reductive acetyl-CoA pathway (Wood-Ljungdahl) [M00377] + Phosphate acetyltransferase-acetate kinase pathway [M00579]
Carbonyl branch
Carbon dioxide
	acsA	K00198		0	0	1	1	0	0
Carbon monoxide
	acsB	K14138		0	0	1	0	0	0
Acetyl-CoA
	pta	K00625		0	0	0	1	0	0
	or
	pta	K13788		1	0	0	1	0	1
	or
	K15024	K15024		1	1	1	0	0	0
Acetyl phosphate
	ackA	K00925		1	1	1	1	0	1
Acetate
Steps (unrepeated)				4
Steps complete				2	2	4	3	0	2
Completeness (%)				50	50	100	75	0	50
Methyl branch (H4F)
Carbon dioxide
	fdhA	K05299		0	0	0	0	0	0
	optional
	fdhB	K15022		1	0	0	0	0	0
	or
	fdhF	K22015		0	0	0	0	0	0
	hydA2	K25123		0	0	1	0	0	0
	hycB	K25124		0	0	1	0	0	0
Formate
	fhs	K01938		0	1	1	0	0	0
Formyl-THF
	folD	K01491		1	1	1	1	0	1
	optional
	fchA	K01500		0	0	1	0	0	0
Methylene-THF
	metF	K00297		1	0	1	1	0	1
	optional
	metV	K25007		0	0	0	0	0	0
	optional
	rnfC2	K25008		0	0	0	0	0	0
Methyl-THF
	acsE	K15023		0	0	1	0	0	0
Methyl-CoFeS
	acsB	K14138		0	0	1	0	0	0
	cdhE	K00197		0	0	1	0	1	0
	cdhD	K00194		0	0	1	0	1	0
Acetyl-CoA
	pta	K00625		0	0	0	1	0	0
	or
	pta	K13788		1	0	0	1	0	1
	or
	K15024	K15024		1	1	1	0	0	0
Acetyl phosphate
	ackA	K00925		1	1	1	1	0	1
Acetate					1
Steps (unrepeated)				8
Steps complete				4	4	6	4	0	4
Completeness (%)				50	50	87.5	50	0	50
Methyl branch (H4MPT; archaeal type) [BioCyc, PWY-7784]
Carbon dioxide
	fwdA	K00200		0	0	0	0	1	0
	fwdB	K00201		0	0	0	0	1	0
	fwdC	K00202		0	0	0	0	1	0
	fwdD	K00203		0	0	0	0	1	0
	optional
	fwdE	K11261		0	0	1	1	1	0
	and
	fwdF	K00205		0	0	0	0	1	0
	or
	fwdG	K11260		0	0	0	0	1	0
	or
	fwdH	K00204		0	0	0	0	1	0
Formylmethanofuran
	ftr	K00672		0	0	0	0	1	0
5-formyl-5,6,7,8-tetrahydromethanopterin
	mch	K01499		0	0	0	0	1	0
5,10-methenyltetrahydromethanopterin
	mtd	K00319		0	0	0	0	1	0
	or
	hmd	K13942		0	0	0	0	0	0
5,10-methylenetetrahydromethanopterin
	mer	K00320		0	0	0	0	1	0
5-methyl-5,6,7,8-tetrahydromethanopterin
	cdhE	EC:2.1.1.245		0	0	0	0	1	0
	cdhD			0	0	1	0	1	0
	and
	cdhA	EC:1.2.7.4		0	0	0	0	1	0
	cdhB			0	0	0	0	1	0
	cdhC			0	0	0	0	1	0
Acetyl-CoA
Steps (unrepeated)				6
Steps complete				0	0	0	0	6	0
Completeness (%)				0	0	0	0	100	0
Reductive glycine pathway [BioCyc, PWY-8303]
Carbon dioxide
	fdhA	K05299		0	0	0	0	0	0
	optional
	fdhB	K15022		1	0	0	0	0	0
	or
	fdhF	K22015		0	0	0	0	0	0
	hydA2	K25123		0	0	1	0	0	0
	hycB	K25124		0	0	1	0	0	0
Formate
	fhs	K01938		0	1	1	0	0	0
10-formyl-THF
	folD	K01491		1	1	1	1	0	1
	or
	mtdA	K00300		0	0	0	0	0	0
(5,10-methenyl-THF)	fchA	K01500		0	0	1	0	0	0
5,10-methylene-THF
	gcvT	K00605		1	1	1	1	0	1
	gcvP	K00281		1	0	0	0	0	1
	or
	gcvPA	K00282		0	1	1	1	0	0
	gcvPB	K00283		0	1	1	1	0	0
	phdD	K00382		1	1	1	1	0	1
	gcvH	K02437		1	1	1	1	0	1
Glycine
	grdA	K10670		0	0	1	0	0	0
	grdE	K10671		0	0	1	0	0	0
	grdB	K10672		0	0	1	0	0	0
	grdD	K21576		0	0	1	0	0	0
	grdC	K21577		0	0	1	0	0	0
Acetyl phosphate
	pta	K00625		0	0	0	1	0	0
	or
	ackA	K00925		1	1	1	1	0	1
(Acetate)	acsA	K01895		0	0	0	1	1	1
Acetyl-CoA
	porA	K00169		0	0	1	0	1	0
	porB	K00170		0	0	1	0	1	0
	porD	K00171		0	0	1	0	1	0
	porC	K00172		0	0	1	0	1	0
	or
	por	K03737		1	1	1	1	0	0
Pyruvate
Steps (unrepeated)				7
Steps complete				3	4	5	4	1	3
Completeness (%)				42.8571	57.1429	71.4286	57.1429	14.2857	42.8571
Hydrogenotrophic methanogenesis [M00567]
Carbon dioxide
	fwdA	K00200		0	0	0	0	1	0
	fwdB	K00201		0	0	0	0	1	0
	fwdC	K00202		0	0	0	0	1	0
	fwdD	K00203		0	0	0	0	1	0
	optional
	fwdE	K11261		0	0	1	1	1	0
	and
	fwdF	K00205		0	0	0	0	1	0
	or
	fwdG	K11260		0	0	0	0	1	0
	or
	fwdH	K00204		0	0	0	0	1	0
Formylmethanofuran
	ftr	K00672		0	0	0	0	1	0
5-formyl-5,6,7,8-tetrahydromethanopterin
	mch	K01499		0	0	0	0	1	0
5,10-methenyltetrahydromethanopterin
	mtd	K00319		0	0	0	0	1	0
	or
	hmd	K13942		0	0	0	0	0	0
5,10-methylenetetrahydromethanopterin
	mer	K00320		0	0	0	0	1	0
5-methyl-5,6,7,8-tetrahydromethanopterin
	mtrA	K00577		0	0	0	0	1	0
	mtrB	K00578		0	0	0	0	1	0
	mtrC	K00579		0	0	0	0	1	0
	mtrD	K00580		0	0	0	0	1	0
	mtrE	K00581		0	0	0	0	1	0
	mtrH	K00584		0	0	0	0	1	0
	optional
	mtrF	K00582		0	0	0	0	1	0
	optional
	mtrG	K00583		0	0	0	0	1	0
2-(methylthio)ethanesulfonate
	mcrA	K00399		0	0	0	0	1	0
	mcrB	K00401		0	0	0	0	1	0
	mcrG	K00402		0	0	0	0	1	0
Methane
Steps (unrepeated)				7
Steps complete				0	0	0	0	7	0
Completeness (%)				0	0	0	0	100	0
Methylotrophic methanogenesis (from methylamine, dimethylamine, or trimethylamine) [M00563]
Methylamine
	mtbA	K14082		0	0	0	0	0	0
	and
	mtmC	K16177		0	0	0	0	0	0
	optional
	mtmB	K16176		0	0	0	0	0	0
2-(methylthio)ethanesulfonate
Dimethylamine
	mtbA	K14082		0	0	0	0	0	0
	and
	mtbC	K16179		0	0	1	0	0	0
	optional
	mtbB	K16178		0	0	0	0	0	0
2-(methylthio)ethanesulfonate
Trimethylamine
	mtbA	K14082		0	0	0	0	0	0
	and
	mttC	K14084		0	0	0	0	0	0
	optional
	mttB	K14083		0	0	0	0	0	0
2-(methylthio)ethanesulfonate
Steps (unrepeated)				1
Steps complete				0	0	0	0	0	0
Completeness (%)				0	0	0	0	0	0
Methylotrophic methanogenesis (from methanol) [M00356]
Methanol
	mtaA	K14080		0	0	1	0	1	0
	mtaB	K04480		0	0	0	0	1	0
	mtaC	K14081		0	0	0	0	1	0
2-(methylthio)ethanesulfonate
	mcrA	K00399		0	0	0	0	1	0
	mcrB	K00401		0	0	0	0	1	0
	mcrG	K00402		0	0	0	0	1	0
Methane
Steps (unrepeated)				2
Steps complete				0	0	0	0	2	0
Completeness (%)				0	0	0	0	100	0
Acetoclastic methanogenesis [M00357]
Acetate
	ackA	K00925		1	1	1	1	0	1
	and
	pta	K00625		0	0	0	1	0	0
	or
	acs	K01895		0	0	0	1	1	1
Acetyl-CoA
	cdhC	K00193		0	0	0	0	1	0
	cdhE	K00197		0	0	1	0	1	0
	cdhD	K00194		0	0	1	0	1	0
5-methyl-5,6,7,8-tetrahydromethanopterin
	mtrA	K00577		0	0	0	0	1	0
	mtrB	K00578		0	0	0	0	1	0
	mtrC	K00579		0	0	0	0	1	0
	mtrD	K00580		0	0	0	0	1	0
	mtrE	K00581		0	0	0	0	1	0
	mtrH	K00584		0	0	0	0	1	0
	optional
	mtrF	K00582		0	0	0	0	1	0
	optional
	mtrG	K00583		0	0	0	0	1	0
2-(methylthio)ethanesulfonate
	mcrA	K00399		0	0	0	0	1	0
	mcrB	K00401		0	0	0	0	1	0
	mcrG	K00402		0	0	0	0	1	0
Methane
Steps (unrepeated)				4
Steps complete				0	0	0	1	4	1
Completeness (%)				0	0	0	25	100	25
Coenzyme M/Coenzyme B regeneration (all methanogenic pathways) [M00567, M00357, M00356, M00563]
Coenzyme M-HTP heterodisulfide (CoM-S-S-CoB)
	hdrA1	K22480		0	0	0	0	1	0
	hdrB1	K22481		0	0	0	0	1	0
	hdrC1	K22482		0	0	0	0	1	0
	or
	hdrA2	K03388		0	0	0	1	1	0
	hdrB2	K03389		0	0	0	1	1	0
	hdrC2	K03390		0	0	0	1	1	0
	or
	hdrD	K08264		0	0	0	0	0	0
	hdrE	K08265		0	0	0	0	0	0
	or
	hdrA2	K03388		0	0	0	1	1	0
	hdrB2	K03389		0	0	0	1	1	0
	hdrC2	K03390		0	0	0	1	1	0
	mdhV	K14127		0	0	0	1	1	0
	and
	mvhA	K14126		0	0	0	0	1	0
	mchG	K14128		0	0	0	0	1	0
	or
	fdhA	K22516		0	0	0	0	1	0
	fdhB	K00125		0	0	0	0	1	0
Coenzyme B + Coenzyme M
Steps (unrepeated)				1
Steps complete				0	0	0	0	1	0
Completeness (%)				0	0	0	0	100	0
Methane oxidation [M00174]
Methane
	pmoA-amoA	K10944		0	0	0	0	0	0
	pmoB-amoB	K10945		0	0	0	0	0	0
	pmoC-amoC	K10946		0	0	0	0	0	0
		or
	mmoX	K16157		0	0	0	0	0	0
	mmoY	K16158		0	0	0	0	0	0
	mmoZ	K16159		0	0	0	0	0	0
	mmoB	K16160		0	0	0	0	0	0
	mmoC	K16161		0	0	0	0	0	0
	mmoD	K16162		0	0	0	0	0	0
Methanol
	mdh1	K14028		0	0	0	0	0	0
	optional
	mdh2	K14029		0	0	0	0	0	0
		or
	xoxF	K23995		0	0	0	0	0	0
Formaldehyde
Steps (unrepeated)				2
Steps complete				0	0	0	0	0	0
Completeness (%)				0	0	0	0	0	0
Dissimilatory nitrate reduction [M00530]
Nitrate
	narG	K00370		1	0	0	0	0	1
	narH	K00371		1	0	0	0	0	1
	narI	K00374		1	0	0	1	0	1
	or
	napA	K02567		0	0	0	0	0	1
	napB	K02568		0	0	0	0	0	1
Nitrite
	nirB	K00362		1	0	0	0	0	1
	nirD	K00363		1	0	0	0	0	1
	or
	nrfA	K03385		0	0	0	1	0	0
	nrfH	K15876		0	0	0	1	0	0
Ammonia
Steps (unrepeated)				2
Steps complete				2	0	0	1	0	2
Completion (%)				100	0	0	50	0	100
Assimilatory nitrate reduction [M00531]
Nitrate
	narB	K00367		0	0	0	0	0	0
	or
	NR	K10534		0	0	0	0	0	0
	or
	nasC	K00372		1	0	0	0	0	1
	optional
	nasB	K00360		0	0	0	0	0	0
Nitrite
	NIT-6	K17877		0	0	0	0	0	0
	or
	nirA	K00366		0	0	0	0	0	0
	or
	nasB	K26139		0	0	0	0	0	1
	or
	nasD	K26138		0	0	0	0	0	1
	nasE	K00361		0	0	0	0	0	0
Ammonia
Steps (unrepeated)				2
Steps complete				1	0	0	0	0	2
Completion (%)				50	0	0	0	0	100
Denitrification [M00529]
Nitrate
	narG	K00370		1	0	0	0	0	1
	narH	K00371		1	0	0	0	0	1
	narI	K00374		1	0	0	1	0	1
	or
	napA	K02567		0	0	0	0	0	1
	napB	K02568		0	0	0	0	0	1
Nitrite
	nirK	K00368		1	0	0	0	0	0
	or
	nirS	K15864		0	0	0	0	0	1
Nitric oxide
	norB	K04561		0	0	0	0	0	1
	norC	K02305		0	0	0	0	0	1
Nitrous oxide
	nosZ	K00376		0	0	0	0	0	1
Nitrogen
Steps (unrepeated)				4
Steps complete				2	0	0	0	0	4
Completion (%)				50	0	0	0	0	100
Nitrogen fixation [M00175]
Nitrogen
	nifD	K02586		0	0	0	1	1	1
	nifK	K02591		0	0	0	1	1	1
	nifH	K02588		0	0	0	1	1	1
	optional
	anfG	K00531		0	0	0	1	0	0
	or
	vnfD	K22896		0	0	0	0	0	0
	vnfK	K22897		0	0	0	0	0	0
	vnfG	K22898		0	0	0	0	0	0
	vnfH	K22899		0	0	0	0	0	0
Ammonia
Steps (unrepeated)				1
Steps complete				0	0	0	1	1	1
Completeness (%)				0	0	0	100	100	100
Nitrification [M00528, M00804]
Ammonia
	amoC	K10946		0	0	0	0	0	0
	amoA	K10944		0	0	0	0	0	0
	amoB	K10945		0	0	0	0	0	0
Hydroxylamine
	hao	K10535		0	0	0	0	0	0
Nitrite
	narG	K00370		1	0	0	0	0	1
	narH	K00371		1	0	0	0	0	1
Nitrate
Steps (unrepeated)				3
Steps complete				1	0	0	0	0	1
Completeness (%)				33.3333	0	0	0	0	33.3333
Anammox (from ammonia) [M00973]
Ammonia
	hzs	K20932		0	0	0	0	0	0
		K20933		0	0	0	0	0	0
		K20934		0	0	0	0	0	0
Hydrazine
	hdh	K20935		0	0	0	0	0	0
Nitrogen
Steps (unrepeated)				2
Steps complete				0	0	0	0	0	0
Completeness (%)				0	0	0	0	0	0
Anammox (from nitrite) [M00973]
Nitrite
	nirK	K00368		1	0	0	0	0	0
	or
	nirS	K15864		0	0	0	0	0	1
Nitric oxide
	hzs	K20932		0	0	0	0	0	0
		K20933		0	0	0	0	0	0
		K20934		0	0	0	0	0	0
Hydrazine
	hdh	K20935		0	0	0	0	0	0
Nitrogen
Steps (unrepeated)				3
Steps complete				1	0	0	0	0	1
Completeness %				33.3333	0	0	0	0	33.3333
Assimilatory sulfate reduction [M00176]
Sulfate
	PAPSS	K13811		0	0	0	0	0	0
	or
	sat	K00958		0	0	0	1	0	0
	cysC	K00860		0	0	0	0	0	0
	or
	cysNC	K00955		0	0	0	0	0	1
	cysD	K00957		1	0	0	0	0	1
	or
	cysN	K00956		1	0	0	0	0	1
	cysD	K00957		1	0	0	0	0	1
	cysC	K00860		0	0	0	0	0	0
3'-Phosphoadenylyl sulfate
	cysH	K00390		1	0	0	1	0	1
Sulfite
	cysJ	K00380		0	0	0	0	0	1
	cysI	K00381		0	0	0	0	0	1
	or
	sir	K00392		1	0	0	0	0	0
Sulfide
Steps (unrepeated)				3
Steps complete				2	0	0	1	0	3
Completion (%)				66.6667	0	0	33.3333	0	100
Dissimilatory sulfate reduction [M00596]
Sulfate
	sat	K00958		0	0	0	1	0	0
Adenylyl sulfate
	aprA	K00394		0	0	0	1	0	1
	aprB	K00395		0	0	0	1	0	0
	and
	qmoA	K16885		0	0	0	1	0	0
	qmoB	K16886		0	0	0	1	0	0
	qmoC	K16887		0	0	0	1	0	0
Sulfite
	dsrA	K11180		0	0	0	1	0	0
	dsrB	K11181		0	0	0	1	0	0
Sulfide
Steps (unrepeated)				3
Steps complete				0	0	0	3	0	0
Completion (%)				0	0	0	100	0	0
Thiosulfate disproportionation [BioCyc, PWY-5350]
Thiosulfate
	sseA, rdhA, TST	K01011		1	0	1	0	1	1
	or
	pspE	K03972		1	1	0	1	1	1
	or
	glpE	K02439		0	0	0	0	0	1
	or
	ygaP	no KO		0	0	0	0	0	0
Sulfite
Steps (unrepeated)				1
Steps complete				1	1	1	1	1	1
Completion (%)				100	100	100	100	100	100
Thiosulfate oxidation (to tetrathionate) [BioCyc, THIOSULFOX-PWY]
Thiosulfate
	tsdA	K19713		0	0	0	0	0	1
Tetrathionate
Steps (unrepeated)				1
Steps complete				0	0	0	0	0	1
Completion (%)				0	0	0	0	0	100
Thiosulfate oxidation [M00595]
Thiosulfate
	soxA	K17222		0	0	0	0	0	0
	soxX	K17223		0	0	0	0	0	0
	soxB	K17224		0	0	0	0	0	0
	optional
	soxC	K17225		0	0	0	0	0	0
	optional
	soxD	K22622		0	0	0	0	0	0
	and
	soxY	K17226		0	0	0	0	0	1
	soxZ	K17227		0	0	0	0	0	0
Sulfate
Steps (unrepeated)				1
Steps complete				0	0	0	0	0	0
Completion (%)				0	0	0	0	0	0
Sulfide oxidation (to sulfur or sulfite, I-III)
Sulfide oxidation I [BioCyc, P222-PWY]
Hydrogen sulfide
	sqr	K17218		1	0	0	1	0	1
Sulfur
Steps (unrepeated)				1
Steps complete				1	0	0	1	0	1
Completion (%)				100	0	0	100	0	100
Sulfide oxidation II [BioCyc, PWY-5274]
Hydrogen sulfide
	fccA	K17230		0	0	0	0	0	1
	fccB	K17229		0	0	0	0	0	0
Sulfur
Steps (unrepeated)				1
Steps complete				0	0	0	0	0	0
Completion (%)				0	0	0	0	0	0
Sulfide oxidation III [ BioCyc, PWY-5285]
Hydrogen sulfide
	sdo	K17725		0	0	0	0	0	0
Sulfite
Steps (unrepeated)				1
Steps complete				0	0	0	0	0	0
Completion (%)				0	0	0	0	0	0
Sulfite oxidation (to sulfate, I-V)
Sulfite oxidation I [BioCyc, PWY-5276]
Sulfite
	sorA	K05301		0	0	0	0	0	0
	sorB	K00386		0	0	0	0	0	0
Sulfate
Steps (unrepeated)				1
Steps complete				0	0	0	0	0	0
Completion (%)				0	0	0	0	0	0
Sulfite oxidation II [BioCyc, PWY-5279]
Sulfite	aprA	K00394		0	0	0	1	0	0
	aprB	K00395		0	0	0	1	0	0
Adenosine 5'-phosphosulfate
	apt	no KO		0	0	0	0	0	0
Sulfate
Steps (unrepeated)				2
Steps complete				0	0	0	1	0	0
Completion (%)				0	0	0	50	0	0
Sulfite oxidation III [BioCyc, PWY-5278]
Sulfite	aprA	K00394		0	0	0	1	0	0
	aprB	K00395		0	0	0	1	0	0
Adenosine 5'-phosphosulfate
	sat	K00958		0	0	0	1	0	0
Sulfate
Steps (unrepeated)				2
Steps complete				0	0	0	2	0	0
Completion (%)				0	0	0	100	0	0
Sulfite oxidation IV [BioCyc, PWY-5326]
Sulfite
	SUOX	K00387		0	0	0	0	0	0
Sulfate
Steps (unrepeated)				1
Steps complete				0	0	0	0	0	0
Completion (%)				0	0	0	0	0	0
Sulfite oxidation V [BioCyc, PWY-7457]
Sulfite
	soeA	K21307		0	0	0	0	0	0
	soeB	K21308		0	0	0	0	0	0
	soeC	K21309		0	0	0	0	0	0
Sulfate
Steps (unrepeated)				1
Steps complete				0	0	0	0	0	0
Completion (%)				0	0	0	0	0	0
Sulfur reduction (I-II)
Sulfur reduction I [BioCyc, PWY-5332]
Elemental sulfur
	sreA	K17219		0	0	0	0	0	0
	sreB	K17220		0	0	0	0	0	0
	sreC	K17221		0	0	0	0	0	0
	or
	sor	K16952		0	0	0	0	0	0
Hydrogen sulfide
Steps (unrepeated)				1
Steps complete				0	0	0	0	0	0
Completion (%)				0	0	0	0	0	0
Sulfur reduction II [BioCyc, PWY-5364]
Elemental sulfur
Polysulfide
	hydB	K17996		0	0	0	1	0	0
	hydG	K17995		0	0	0	1	1	0
	or
	psrA, phsA	K08352		0	0	0	1	0	0
	psrB, phsB	K16293, K08353		0	0	0	0	0	0
	psrC, phsC	K16294, K08354		0	0	0	1	0	0
Hydrogen sulfide
Steps (unrepeated)				1
Steps complete				0	0	0	1	1	0
Completion (%)				0	0	0	100	50	0
Tetrathionate oxidation [BioCyc, PWY-6327]
Tetrathionate
	tetH	no KO		0	0	0	0	0	0
Sulfate
Steps (unrepeated)				1
Steps complete				0	0	0	0	0	0
Completion (%)				0	0	0	0	0	0
Tetrathionate reduction [BioCyc, PWY-5358]
Tetrathionate
	tsdA	K19713		0	0	0	0	0	1
	or
	otr	no KO		0	0	0	0	0	0
	or
	ttrA	K08357		0	0	0	0	0	1
	ttrB	K08358		0	0	0	0	0	1
	ttrC	K08358		0	0	0	0	0	1
Thiosulfate
Steps (unrepeated)				1
Steps complete				0	0	0	0	0	1
Completion (%)				0	0	0	0	0	100

## Sheet: present-absent
				g__Tessaracoccus;s__Tessaracoccus lapidicaptus	g__UBA2212;s__	g__Acetoanaerobium;s__Acetoanaerobium noterae	g__Nitratidesulfovibrio;s__	g__Methanobacterium;s__	g__Pseudomonas;s__Pseudomonas stutzeri
				1 = present, 0 = absent
Acetate oxidation
acetyl-CoA synthetase	ACS	EC 6.2.1.1		0	0	0	1	1	1
Bicarbonate conversion
carbonic anhydrase	can, cynT	K01673		1	0	0	1	1	1
gamma carbonic anhydrase	Cam	K01726		0	1	1	0	1	1
Desulfonation, sulfonate utilization
sulfonate transport system substrate-binding protein	ssuA	K15553		0	0	0	0	0	1
sulfonate transport system permease protein	ssuC	K15554		0	0	0	0	0	1
sulfonate transport system ATP-binding protein	ssuB	K15555		0	0	0	0	0	1
alkanesulfonate monooxygenase	ssuD	K04091		0	0	0	0	0	1
FMN reductase	ssuE	K00299		1	0	0	0	0	1
choline sulfatase	betC	K01133		0	0	0	0	0	0
arylsulfatase	aslA	no KO		0	0	0	0	0	0
sulfopropanediol 3-dehydrogenase	hpsN	K15509		0	0	0	0	0	0
taurine transport system substrate-binding protein	tauA	K15551		0	0	0	0	0	0
taurine transport system ATP-binding protein	tauB	K10831		0	0	0	0	0	0
taurine transport system permease protein	tauC	K15552		0	0	0	0	0	0
taurine dioxygenase	tauD	K03119		0	0	0	0	0	0
sulfoacetaldehyde acetyltransferase	xsc	K03852		0	0	0	0	0	0
Hydrogen oxidation
FeFe hydrogenases	A1,3	fefe-group-a13.hmm		0	1	1	0	0	0
	A2	fefe-group-a2.hmm		0	0	0	0	0	0
	A4	fefe-group-a4.hmm		0	0	1	0	0	0
	B	fefe-group-b.hmm		0	2	0	0	0	0
	C1	fefe-group-c1.hmm		0	0	0	0	0	0
	C2	fefe-group-c2.hmm		0	0	1	0	0	0
	C3	fefe-group-c3.hmm		0	0	1	0	0	0
Fe hydrogenase	Fe	fe.hmm		0	0	0	0	0	0
Ni-Fe hydrogenases	1	nife-group-1.hmm		0	0	0	3	0	0
	2A,D,E	nife-group-2ade.hmm		0	0	0	0	0	0
	2B,C	nife-group-2bc.hmm		0	0	0	0	0	0
	3A,B,D	nife-group-3abd.hmm		0	0	0	0	0	0
	3C	nife-group-3c.hmm		0	0	0	0	2	0
	4A-G	nife-group-4a-g.hmm		0	0	0	2	0	0
	4H,I	nife-group-4hi.hmm		0	0	0	0	2	0
Hydrogen production
hydrogen production V	PWY-6772	formate hydrogenlyase		0	0	0	1	0	0
Fermentation (by substrate)
Substrate	Pathway
acetyl-CoA	P142-PWY			0	1	1	1	0	0
	PWY0-1312			1	1	1	1	0	1
	PWY-8328			0	0	1	1	0	1
	PWY-5536			0	0	0	0	0	1
	PWY-5676			0	1	1	0	0	0
acetylene	P161-PWY			0	0	0	1	0	0
L-glutamate	GLUDEG-II-PWY			0	1	0	0	0	0
pyruvate	P108-PWY			1	0	0	0	0	0
	PWY-5485			1	1	1	1	0	1
	PWY-5480			1	0	0	0	0	0
	PWY-8724			0	0	0	0	0	1
	CENTFERM-PWY			0	1	1	0	0	0
	PWY-5480			1	0	0	0	0	0
(S)-lactate	PWY-8086			1	0	0	0	0	0
(S)-propane-1,2-diol	PWY7013			1	0	0	0	0	0
L-threonine	PWY-5437			1	1	1	1	0	1
Fermentation (by product)
Product	Pathway
acetate	PWY0-1312			1	1	1	1	0	1
	PWY-5485			1	1	1	1	0	1
	PWY-8086			1	0	0	0	0	0
	PWY-8328			0	0	1	1	0	1
	PWY-5536			0	0	0	0	0	1
	GLUDEG-II-PWY			0	1	0	0	0	0
	P142-PWY			0	1	1	1	0	0
	P161-PWY			0	0	0	1	0	0
	P163-PWY			0	0	1	0	0	0
ammonia	PWY-5437			1	1	1	1	0	1
	P163-PWY			0	0	1	0	0	0
butanoate	PWY-5676			0	1	1	0	0	0
	GLUDEG-II-PWY			0	1	0	0	0	0
	CENTFERM-PWY			0	1	1	0	0	0
carbon dioxide	PWY-8086			1	0	0	0	0	0
	P142-PWY			0	1	1	1	0	0
	CENTFERM-PWY			0	1	1	0	0	0
ethanol	PWY-5480			1	0	0	0	0	0
	P161-PWY			0	0	0	1	0	0
formate	PWY-5485			1	1	1	1	0	1
	PWY-5480			1	0	0	0	0	0
	PWY-5437			1	1	1	1	0	1
hydrogen	PWY-8086			1	0	0	0	0	0
	GLUDEG-II-PWY			0	1	0	0	0	0
propan-1-ol	PWY7013			1	0	0	0	0	0
propanoate	PWY-5437			1	1	1	1	0	1
	PWY7013			1	0	0	0	0	0
	P108-PWY			1	0	0	0	0	0
	PWY-8086			1	0	0	0	0	0
(R)-lactate	PWY-8724			0	0	0	0	0	1
Amino acid fermentation (Stickland)
Summary
Reductive Reactions
Glycine				-	-	+	-	-	-
L-alanine				-	-	-	-	-	-
L-arginine				-	-	-	+	-	+
L-glutamate				-	-	-	-	-	-
L-leucine				-	-	-	-	-	-
L-phenylalanine				-	-	-	-	-	-
L-proline				-	-	+	-	-	-
L-tryptophan				-	-	-	-	-	-
L-tyrosine				-	-	-	-	-	-
Oxidative Reactions
L-alanine				-	-	-	-	-	-
L-argninine				-	-	+	-	-	-
L-isoleucine				-	-	-	-	-	-
L-leucine				-	-	-	-	-	-
L-valine				-	-	-	-	-	-
Stickland, reductive reactions
Glycine degradation [BioCyc, PWY-8015]
glycine
	grdA	1.21.4.2		0	0	1	0	0	0
	grdE			0	0	1	0	0	0
	grdB			0	0	1	0	0	0
	grdD			0	0	1	0	0	0
	grdC			0	0	1	0	0	0
acetyl phosphate
	ackA	2.7.2.1/2.7.2.15		1	1	1	1	0	1
acetate
L-alanine degradation VI [BioCyc, PWY-8188]
L- alanine
	alanine aminotransferase	2.6.1.2		0	0	0	0	0	0
pyruvate
	lactate dehydrogenase	1.1.1.28		0	0	0	0	0	1
lactate
	lactate-CoA transferase	2.8.3.1		0	0	0	0	0	0
lactoyl CoA
	lactoyl-CoA dehydratase	4.2.1.54		0	0	0	0	0	0
acryloyl-CoA
	acryloyl-CoA reductase	1.3.1.95		0	0	0	0	0	0
propanoyl-CoA
	propanoate-CoA transferase	2.8.3.1		0	0	0	0	0	0
acetate
L-arginine degradation XIII [BioCyc, PWY-8187]
L-arginine
	arginine deiminase	3.5.3.6		0	0	1	1	0	1
L-citrulline
	arcB	2.1.3.3		1	0	1	1	1	1
L-ornithine
	ornithine aminotransferase	2.6.1.13		1	1	0	1	1	1
L-glutamate-5-semialdehyde
(S)-1-pyrroline-5-carboxylate
	proC	1.5.1.2		1	1	1	1	0	1
L-proline
L-glutamate degradation XI [BioCyc, PWY-8190]
L-glutamate
	gdhA	1.4.1.2		1	1	1	1	0	1
2-oxoglutarate
		1.1.1.399		0	0	0	0	0	0
(R)-2-hydroxyglutarate
	gctB	2.8.3.12		0	0	1	0	0	1
	gctA			0	0	1	0	0	1
(R)-2-hydroxyglutaryl-CoA
	hgdB	4.2.1.167		0	0	0	0	0	0
	hgdA			0	0	0	0	0	0
(E)-glutaconyl-CoA
	gcdD	7.2.4.5		0	0	1	0	0	0
	gcdC			1	0	1	0	0	0
	gcdB			0	0	0	0	0	0
	gcdA			0	0	0	0	0	0
crotonyl-CoA
	bcd	1.3.1.109		0	0	0	0	0	0
	etfB1			0	0	0	0	0	0
	etfA1			0	0	0	0	0	0
butanoyl-CoA
	cat3	2.8.3.1/2.8.3.8		0	0	0	0	0	0
acetyl-CoA
L-leucine degradation IV [BioCyc, PWY-7767]
L-leucine
		2.6.1.6/2.6.1.42		1	0	1	1	1	1
4-methyl-2-oxopentanoate
	ldhA	1.1.1.345		0	0	0	0	0	0
(R)-2-hydroxy-4-methylpentanoate
	hadA	2.8.3.24		0	0	0	0	0	0
(R)-2-hydroxy-4-methylpentanoyl-CoA
	hadB	4.2.1.157		0	0	0	0	0	0
	hadC			0	0	0	0	0	0
4-methylpent-2-enoyl-CoA
		1.3.1.44		0	0	0	0	0	0
4-methylpentanoyl-CoA
L-phenylalanine degradation VI [BioCyc, PWY-8014]
L-phenylalanine
	phenylalanine transaminase	2.6.1.1/2.6.1.2/2.6.1.57		0	0	0	0	0	0
3-phenyl-2-oxopropanoate
	fldH	1.1.1.110		0	0	0	0	0	0
(R)-3-(phenyl)lactate
	fldA	2.8.3.17		0	0	0	0	0	0
trans-cinnamate
	acdA	1.3.8.15		0	0	0	0	0	0
3-phenylpropanoate		1.3.8.15
(E)-cinnamoyl-CoA
	fldB	4.2.1.175		0	0	0	0	0	0
	fldC			0	0	0	0	0	0
(R)-3-(phenyl)lactoyl-CoA
L-proline degradation II [BioCyc, PWY-8186]
L-proline
	prdF	5.1.1.4		0	0	1	0	0	0
D-proline
	prdA	1.21.4.1		0	0	1	0	0	0
	prdB			0	0	1	0	0	0
5-aminopentanoate
L-tryptophan degradation XIII [BioCyc, PWY-8017]
L-tryptophan
	tryptophan transaminase	2.6.1.1/2.6.1.27		0	0	0	0	0	0
(indol-3-yl)pyruvate
	fldH	1.1.1.110		0	0	0	0	0	0
(R)-3-(indol-3-yl)lactate
	fldA	2.8.3.17		0	0	0	0	0	0
3-(indol-3-yl)acrylate
	acdA	1.3.8.15		0	0	0	0	0	0
3-(1H-indol-3-yl)propanoate
(R)-3-(indol-3-yl)lactoyl-CoA
	fldB	4.2.1.175		0	0	0	0	0	0
	fldC			0	0	0	0	0	0
3-(indol-3-yl)acryloyl-CoA
L-tyrosine degradation V [BioCyc, PWY-8016]
L-tyrosine
	tyrosine transaminase	2.6.1.1/2.6.1.5/2.6.1.27/2.6.1.57		0	0	0	0	0	0
3-(4-hydroxyphenyl)pyruvate
	fldH	1.1.1.11		0	0	0	0	0	0
(R)-3-(4-hydroxyphenyl)lactate
	fldA	2.8.3.17		0	0	0	0	0	0
4-coumarate
	acdA	1.3.8.15		0	0	0	0	0	0
phloretate
(R)-3-(4-hydroxyphenyl)lactoyl-CoA
	fldB	4.2.1.175		0	0	0	0	0	0
	fldC			0	0	0	0	0	0
(E)-4-coumaroyl-CoA
Stickland, oxidative reactions
L-alanine degradation [BioCyc, PWY-8189]
L-alanine
	alanine aminotransferase	2.6.1.2		0	0	0	0	0	0
pyruvate
	pyruvate-ferredoxin oxidoreductase	1.2.7.1		0	1	1	1	0	0
acetyl-CoA
L-arginine degradation XIV [BioCyc, PWY-6344]
L-arginine
	arginine deaminase	3.5.3.6		0	0	1	1	0	1
L-citrulline
	arcB	2.1.3.3		1	0	1	1	1	1
L-ornithine
	orr	5.1.1.10/5.1.1.12		0	0	1	0	0	0
D-ornithine
	oraS	5.4.3.5		0	0	1	0	0	0
	oraE			0	0	1	0	0	0
4-diaminopentanoate
	ord	1.4.1.26		0	0	1	0	0	0
2-amino-4-oxopentanoate
	ortA	2.3.1.263		0	0	1	0	0	0
	ortB			0	0	1	0	0	0
acetyl-CoA
L-isoleucine degradation III [BioCyc, PWY-8184]
L-isoleucine
		2.6.1.42		1	0	1	1	1	1
(3S)-3-methyl-2-oxopentanoate
		1.2.7.7		0	0	0	0	0	0
(2S)-2-methylbutanoyl-CoA
		3.1.2.-
2-methylbutanoate
L-leucine degradation V [BioCyc, PWY-8185]
L-leucine
		2.6.1.6/2.6.1.42		1	0	1	1	1	1
4-methyl-2-oxopentanoate
		1.2.7.7		0	0	0	0	0	0
3-methylbutanoyl-CoA
L-valine degradation III [BioCyc, PWY-8183]
L-valine
		2.6.1.42		1	0	1	1	1	1
3-methyl-2-oxobutanoate
	vorC	1.2.7.7		0	0	0	0	1	0
	vorB			0	0	0	0	1	0
	vorA			0	0	0	0	1	0
isobutanoyl-CoA
Syntrophic lactate fermentation [BioCyc, PWY-8377]
(S)-lactate
	L-lactate dehydrogenase	1.1.2.3		1	1	1	1	0	0
pyruvate
(R)-lactate
	D-lactate dehydrogenase	1.1.2.5		0	0	0	0	0	1
pyruvate
pyruvate
	pyruvate:ferredoxin oxidoreductase	1.2.7.1		0	1	1	1	0	0
carbon dioxide
	formate dehydrogenase (cytochrome c-553) subunit alpha	1.17.2.3		0	0	0	1	0	0
	formate dehydrogenase (cytochrome c-553) subunit beta			0	0	0	1	0	0
	type I cytochrome c3			0	0	0	1	0	0
formate
pyruvate
	pyruvate:ferredoxin oxidoreductase	1.2.7.1		0	1	1	1	0	0
acetyl-CoA
	acetate kinase	2.7.2.15		1	1	1	1	0	1
acetate
pyruvate
	pyruvate:ferredoxin oxidoreductase	1.2.7.1		0	1	1	1	0	0
reduced type I cytochrome c3
	periplasmic [NiFe] hydrogenase 1 large subunit	1.12.2.1		0	0	0	1	0	0
	periplasmic [NiFe] hydrogenase 1 small subunit			0	0	0	1	0	0
hydrogen
Oxygen metabolism
cytochrome c oxidase subunit I	coxA	TIGR02891.hmm		1	0	0	1	0	1
cytochrome c oxidase subunit II	coxB	TIGR02866.hmm		1	0	0	1	0	1
cytochrome c oxidase cbb3-type subunit I	ccoN	TIGR00780.hmm		0	0	0	0	0	1
cytochrome c oxidase cbb3-type subunit II	ccoO	TIGR00781.hmm		0	0	0	0	0	1
cytochrome c oxidase cbb3-type subunit III	ccoP	TIGR00782.hmm		1	0	0	0	0	1
cytochrome o ubiquinol oxidase subunit II	cyoA	TIGR01433.hmm		0	0	0	0	0	0
cytochrome o ubiquinol oxidase subunit IV	cyoD	TIGR02847.hmm		0	0	0	0	0	0
cytochrome o ubiquinol oxidase subunit I	cyoB	K02298.hmm		0	0	0	0	0	0
cytochrome o ubiquinol oxidase subunit III	cyoC	K02299.hmm		0	0	0	0	0	0
cytochrome bd ubiquinol oxidase subunit I	cydA	PF01654.hmm		1	0	0	1	0	1
cytochrome bd ubiquinol oxidase subunit II	cydB	TIGR00203.hmm		1	0	0	1	0	1
cytochrome aa3-600 menaquinol oxidase subunit II	qoxA	TIGR01432.hmm		0	0	0	0	0	0
cytochrome aa3-600 menaquinol oxidase subunit I	qoxB	TIGR02882.hmm		0	0	0	0	0	0
Ca2+-transporting P-type ATPase
P-type Ca2+ transporter 2C	ATP2C	7.2.2.10		1	1	1	1	1	0
Anaplerotic bicarbonate assimilation
pyruvate carboxylase	PC, pyc	6.4.1.1		1	0	1	1	1	1
phosphoenol pyruvate (PEP) carboxylase	ppc	4.1.1.31		1	1	0	0	0	1
